# Supplementary material for: Real-Time Nitrogen Application of Rice Varieties Based on Leaf Colour Chart under System of Rice Intensification in Temperate Climate
Source: MDPI journal article supplement (doi:10.3390/agronomy12092229), 2022-09-19
Supplement: s1 [file s1]

## Supplementary Material

Figure S1: Different LCC shades used for nitrogen application in rice varieties SR-4 and Sr-3.

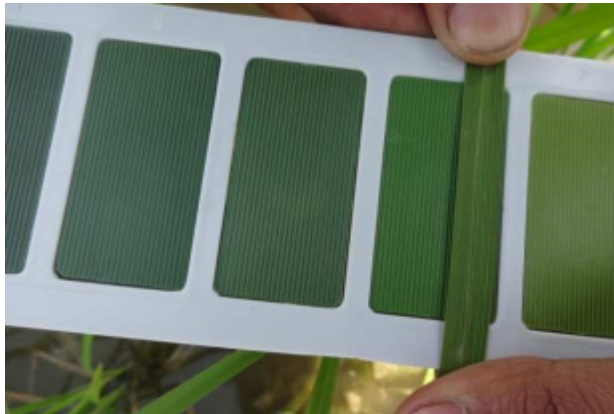

$LCC \leq 3 @ 30 \text{ kg ha}^{-1}$

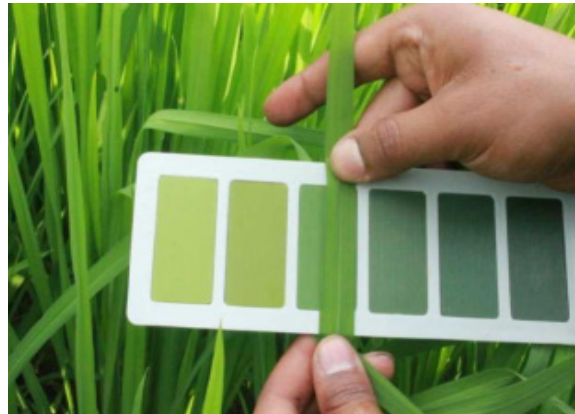

$LCC \leq 3 @ 20 \text{ kg ha}^{-1}$

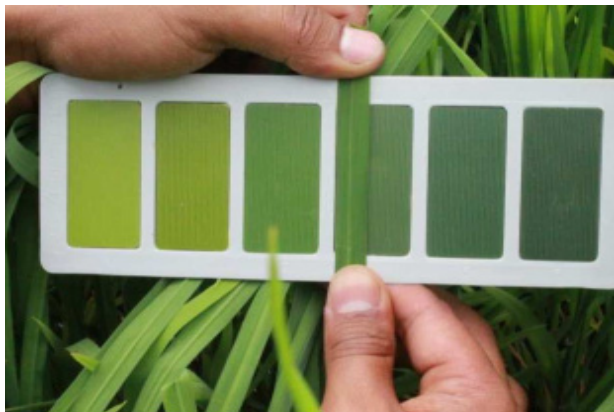

$LCC \leq 4 @ 30 \text{ kg ha}^{-1}$

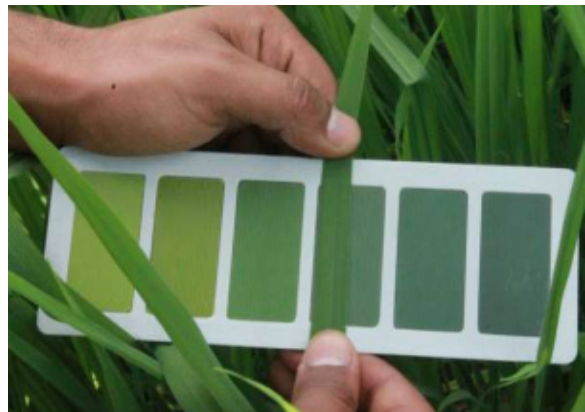

$LCC \leq 4 @ 20 \text{ kg ha}^{-1}$

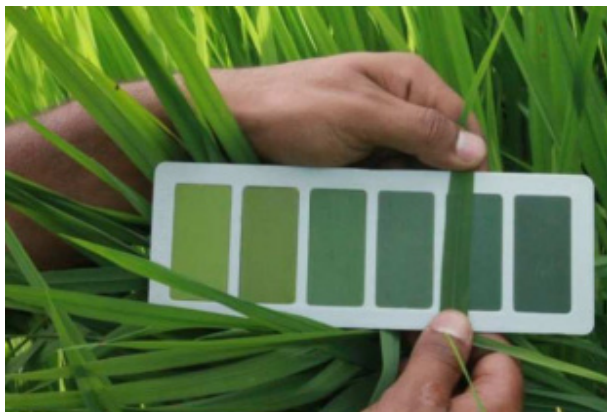

$LCC \leq 5 @ 30 \text{ kg ha}^{-1}$

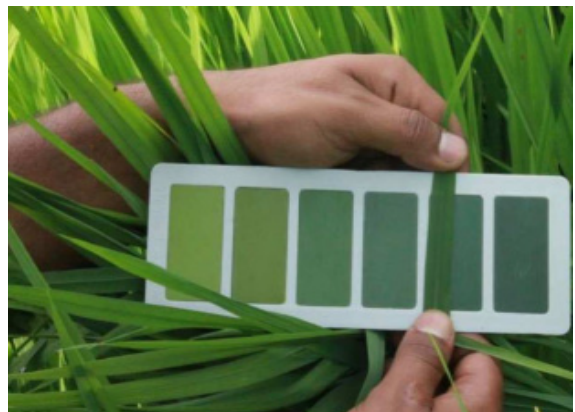

$LCC \leq 5 @ 20 \text{ kg ha}^{-1}$
